# Supplementary material for: Quantitative Proteomics and Phosphoproteomics Support a Role for Mut9-Like Kinases in Multiple Metabolic and Signaling Pathways in Arabidopsis
Source: PubMed Central journal article supplement (PMC8066427; doi:10.1016/j.mcpro.2021.100063), 2021-03-05
Supplement: mmc1.pdf [file mmc1.pdf]

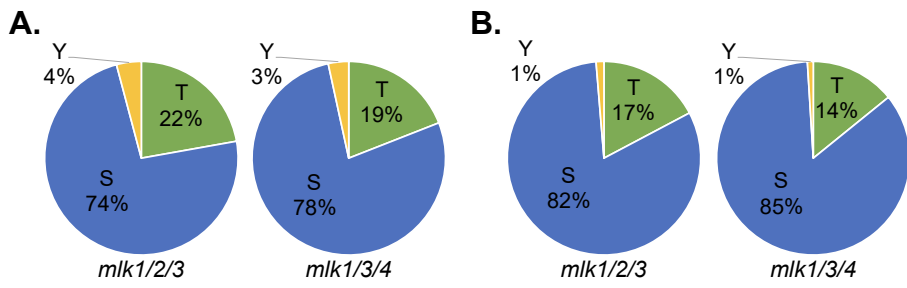

**Supplemental Figure S1. Phosphosite distribution of differentially phosphorylated peptides in *mlk* mutants**

The of threonine (T) phosphorylation, serine (S) phosphorylation, and tyrosine (Y) phosphorylation sites identified as having altered abundance in *mlk1/2/3* or *mlk1/3/4* mutants compared to wildtype samples at ZT12 (A) or ZT14 (B).

|           | # | Motif        | Motif Score | Foreground Matches | Foreground Size | Background Matches | Background Size | Fold Increase |
|-----------|---|--------------|-------------|--------------------|-----------------|--------------------|-----------------|---------------|
| Decreased | 1 | ....R.S..... | 5.08        | 12                 | 48              | 55686              | 1013104         | 4.55          |
| Increased | 1 | .....SP..... | 5.71        | 11                 | 37              | 53111              | 1013104         | 5.67          |

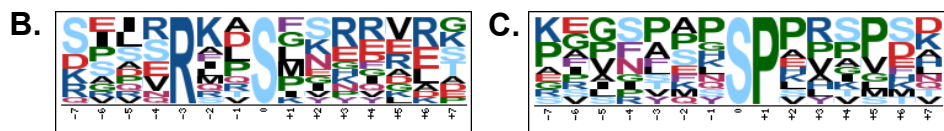

**Supplemental Figure S2.** Motif-X analysis of phosphopeptides with decreased abundance in *mlk1/2/3* mutants.

Phosphopeptides with altered abundance in *mlk1/2/3* (ZT12) mutants were extended and aligned using PEPTIDEXTENDER (<http://schwartzlab.uconn.edu/pepextend>). Motif-X analysis was then performed with the probability threshold was set to p-value  $\leq 10^{-6}$ , the occurrence threshold was set to 10. The default IPI Arabidopsis Proteome data set was used as the background data set.

Supplemental Table S1. Summary of Pairwise Comparisons

| Pairwise Comparison        | Global Proteome                       |                                  |                                  | Phosphoproteome                       |                                  |                                  |
|----------------------------|---------------------------------------|----------------------------------|----------------------------------|---------------------------------------|----------------------------------|----------------------------------|
|                            | Total Peptides with Altered Abundance | Proteins with Increase Abundance | Proteins with Decrease Abundance | Total Peptides with Altered Abundance | Proteins with Increase Abundance | Proteins with Decrease Abundance |
| <i>mlk123_ZT12/WT_ZT12</i> | 15                                    | 0                                | 13                               | 113                                   | 44                               | 50                               |
| <i>mlk134_ZT12/WT_ZT12</i> | 232                                   | 28                               | 95                               | 429                                   | 103                              | 190                              |
| <i>mlk123_ZT14/WT_ZT14</i> | 20                                    | 6                                | 7                                | 170                                   | 87                               | 63                               |
| <i>mlk134_ZT14/WT_ZT14</i> | 228                                   | 76                               | 36                               | 306                                   | 108                              | 115                              |

**Supplemental Table S2. REVIGO Cellular Component GO-term Enrichment Analysis**

| <i>mlk1/2/3</i> ZT12 |                                                 |               |                           |             |                |
|----------------------|-------------------------------------------------|---------------|---------------------------|-------------|----------------|
| GO-term ID           | Description                                     | Frequency     | Log <sub>10</sub> p-value | Uniqueness  | Dispensability |
| <b>GO:0005654</b>    | <b>nucleoplasm</b>                              | <b>1.37%</b>  | <b>-3.0182</b>            | <b>0.15</b> | <b>0</b>       |
| GO:0044451           | <i>nucleoplasm part</i>                         | 0.90%         | -2.0482                   | 0.17        | 0.82           |
| <b>GO:0043226</b>    | <b>organelle</b>                                | <b>20.79%</b> | <b>-2.5969</b>            | <b>0.75</b> | <b>0</b>       |
| <b>GO:0005634</b>    | <b>nucleus</b>                                  | <b>8.97%</b>  | <b>-4.4283</b>            | <b>0.13</b> | <b>0.51</b>    |
| GO:0043231           | <i>intracellular membrane-bounded organelle</i> | 13.76%        | -2.6364                   | 0.12        | 0.75           |
| <b>GO:0043227</b>    | <b>membrane-bounded organelle</b>               | <b>14.45%</b> | <b>-3.382</b>             | <b>0.17</b> | <b>0.57</b>    |
| GO:0043229           | <i>intracellular organelle</i>                  | 19.92%        | -2.6144                   | 0.16        | 0.7            |

  

| <i>mlk1/3/4</i> ZT12 |                                      |                |                           |             |                |
|----------------------|--------------------------------------|----------------|---------------------------|-------------|----------------|
| GO-term ID           | Description                          | Frequency      | Log <sub>10</sub> p-value | Uniqueness  | Dispensability |
| <b>GO:0005575</b>    | <b>cellular_component</b>            | <b>100.00%</b> | <b>-1.7986</b>            | <b>1</b>    | <b>0</b>       |
| <b>GO:0005623</b>    | <b>cell</b>                          | <b>53.55%</b>  | <b>-12.1624</b>           | <b>0.97</b> | <b>0</b>       |
| <b>GO:0005654</b>    | <b>nucleoplasm</b>                   | <b>1.37%</b>   | <b>-13.8069</b>           | <b>0.31</b> | <b>0</b>       |
| GO:0044451           | <i>nucleoplasm part</i>              | 0.90%          | -10.1113                  | 0.33        | 0.82           |
| GO:0070013           | <i>intracellular organelle lumen</i> | 2.74%          | -8.9747                   | 0.3         | 0.95           |
| GO:0031981           | <i>nuclear lumen</i>                 | 2.29%          | -10.58                    | 0.29        | 0.87           |
| GO:0043233           | <i>organelle lumen</i>               | 2.74%          | -8.9747                   | 0.33        | 0.97           |
| <b>GO:0031974</b>    | <b>membrane-enclosed lumen</b>       | <b>2.74%</b>   | <b>-8.9747</b>            | <b>0.94</b> | <b>0</b>       |
| <b>GO:0032991</b>    | <b>macromolecular complex</b>        | <b>14.01%</b>  | <b>-3.6517</b>            | <b>0.95</b> | <b>0</b>       |
| <b>GO:0043226</b>    | <b>organelle</b>                     | <b>20.79%</b>  | <b>-11.9788</b>           | <b>0.95</b> | <b>0</b>       |
| <b>GO:0043234</b>    | <b>protein complex</b>               | <b>6.42%</b>   | <b>-4.0467</b>            | <b>0.88</b> | <b>0</b>       |
| <b>GO:0005829</b>    | <b>cytosol</b>                       | <b>2.55%</b>   | <b>-6.6478</b>            | <b>0.72</b> | <b>0.17</b>    |
| <b>GO:0044424</b>    | <b>intracellular part</b>            | <b>35.65%</b>  | <b>-11.7077</b>           | <b>0.68</b> | <b>0.22</b>    |
| <b>GO:0005622</b>    | <b>intracellular</b>                 | <b>41.18%</b>  | <b>-11.4711</b>           | <b>0.77</b> | <b>0.32</b>    |
| <b>GO:0044444</b>    | <b>cytoplasmic part</b>              | <b>12.66%</b>  | <b>-2.011</b>             | <b>0.66</b> | <b>0.35</b>    |
| <b>GO:0044464</b>    | <b>cell part</b>                     | <b>52.39%</b>  | <b>-10.7959</b>           | <b>0.77</b> | <b>0.38</b>    |
| <b>GO:0043227</b>    | <b>membrane-bounded organelle</b>    | <b>14.45%</b>  | <b>-12.9172</b>           | <b>0.47</b> | <b>0.4</b>     |

|                   |                                                     |              |                 |             |             |
|-------------------|-----------------------------------------------------|--------------|-----------------|-------------|-------------|
| GO:0043229        | <i>intracellular organelle</i>                      | 19.92%       | -11.5935        | 0.39        | 0.7         |
| <b>GO:0000785</b> | <b>chromatin</b>                                    | <b>0.47%</b> | <b>-9.0726</b>  | <b>0.41</b> | <b>0.46</b> |
| GO:0044427        | <i>chromosomal part</i>                             | 1.12%        | -7.4962         | 0.39        | 0.84        |
| GO:0000790        | <i>nuclear chromatin</i>                            | 0.23%        | -1.6216         | 0.34        | 0.78        |
| <b>GO:0005694</b> | <b>chromosome</b>                                   | <b>1.51%</b> | <b>-6.6556</b>  | <b>0.5</b>  | <b>0.49</b> |
| <b>GO:0005652</b> | <b>nuclear lamina</b>                               | <b>0.00%</b> | <b>-2.2358</b>  | <b>0.53</b> | <b>0.51</b> |
| <b>GO:0043228</b> | <b>non-membrane-bounded organelle</b>               | <b>8.41%</b> | <b>-2.4597</b>  | <b>0.5</b>  | <b>0.56</b> |
| <b>GO:0044428</b> | <b>nuclear part</b>                                 | <b>3.12%</b> | <b>-10.7447</b> | <b>0.37</b> | <b>0.57</b> |
| GO:0044446        | <i>intracellular organelle part</i>                 | 8.94%        | -7.9355         | 0.32        | 0.73        |
| <b>GO:0044422</b> | <b>organelle part</b>                               | <b>9.43%</b> | <b>-7.8861</b>  | <b>0.5</b>  | <b>0.58</b> |
| <b>GO:0005634</b> | <b>nucleus</b>                                      | <b>8.97%</b> | <b>-19.4547</b> | <b>0.39</b> | <b>0.58</b> |
| GO:0043231        | <i>intracellular membrane-bounded organelle</i>     | 13.76%       | -12.6216        | 0.37        | 0.75        |
| <b>GO:0031965</b> | <b>nuclear membrane</b>                             | <b>0.10%</b> | <b>-1.7721</b>  | <b>0.46</b> | <b>0.6</b>  |
| <b>GO:0005849</b> | <b>mRNA cleavage factor complex</b>                 | <b>0.05%</b> | <b>-1.71</b>    | <b>0.42</b> | <b>0.62</b> |
| <b>GO:0016607</b> | <b>nuclear speck</b>                                | <b>0.09%</b> | <b>-3.6498</b>  | <b>0.42</b> | <b>0.65</b> |
| GO:0016604        | <i>nuclear body</i>                                 | 0.19%        | -2.4895         | 0.39        | 0.7         |
| <b>GO:0043232</b> | <b>intracellular non-membrane-bounded organelle</b> | <b>7.95%</b> | <b>-2.4597</b>  | <b>0.41</b> | <b>0.67</b> |

*mlk1/2/3 ZT14*

| GO-term ID        | Description                           | Frequency     | Log <sub>10</sub> p-value | Uniqueness  | Dispensability |
|-------------------|---------------------------------------|---------------|---------------------------|-------------|----------------|
| <b>GO:0005623</b> | <b>cell</b>                           | <b>53.55%</b> | <b>-1.3298</b>            | <b>0.93</b> | <b>0</b>       |
| <b>GO:0031974</b> | <b>membrane-enclosed lumen</b>        | <b>2.74%</b>  | <b>-1.5258</b>            | <b>0.87</b> | <b>0</b>       |
| <b>GO:0044427</b> | <b>chromosomal part</b>               | <b>1.12%</b>  | <b>-3.9547</b>            | <b>0.26</b> | <b>0</b>       |
| GO:0000785        | <i>chromatin</i>                      | 0.47%         | -1.9872                   | 0.27        | 0.84           |
| GO:1902494        | <i>catalytic complex</i>              | 3.73%         | -3.6925                   | 0.82        | 0              |
| <b>GO:0044422</b> | <b>organelle part</b>                 | <b>9.43%</b>  | <b>-1.5686</b>            | <b>0.35</b> | <b>0.36</b>    |
| <b>GO:0043228</b> | <b>non-membrane-bounded organelle</b> | <b>8.41%</b>  | <b>-1.3565</b>            | <b>0.36</b> | <b>0.51</b>    |
| <b>GO:0031981</b> | <b>nuclear lumen</b>                  | <b>2.29%</b>  | <b>-2.757</b>             | <b>0.23</b> | <b>0.53</b>    |
| GO:0043233        | <i>organelle lumen</i>                | 2.74%         | -1.5258                   | 0.24        | 0.97           |
| GO:0070013        | <i>intracellular organelle lumen</i>  | 2.74%         | -1.5258                   | 0.23        | 0.95           |

|                   |                                                     |              |                |             |             |
|-------------------|-----------------------------------------------------|--------------|----------------|-------------|-------------|
| <b>GO:0005694</b> | <b>chromosome</b>                                   | <b>1.51%</b> | <b>-2.9914</b> | <b>0.37</b> | <b>0.54</b> |
| <b>GO:0005634</b> | <b>nucleus</b>                                      | <b>8.97%</b> | <b>-2.8239</b> | <b>0.32</b> | <b>0.55</b> |
| <b>GO:0044428</b> | <b>nuclear part</b>                                 | <b>3.12%</b> | <b>-2.063</b>  | <b>0.27</b> | <b>0.61</b> |
| GO:0044446        | <i>intracellular organelle part</i>                 | 8.94%        | -1.5918        | 0.22        | 0.73        |
| <b>GO:0043232</b> | <b>intracellular non-membrane-bounded organelle</b> | <b>7.95%</b> | <b>-1.3565</b> | <b>0.28</b> | <b>0.67</b> |

*mlk1/3/4* ZT14

| <b>GO-term ID</b> | <b>Description</b>                              | <b>Frequency</b> | <b>Log<sub>10</sub> p-value</b> | <b>Uniqueness</b> | <b>Dispensability</b> |
|-------------------|-------------------------------------------------|------------------|---------------------------------|-------------------|-----------------------|
| <b>GO:0005623</b> | <b>cell</b>                                     | <b>53.55%</b>    | <b>-5.2218</b>                  | <b>0.95</b>       | <b>0</b>              |
| <b>GO:0005654</b> | <b>nucleoplasm</b>                              | <b>1.37%</b>     | <b>-6.6778</b>                  | <b>0.29</b>       | <b>0</b>              |
| GO:0043233        | <i>organelle lumen</i>                          | 2.74%            | -2.4559                         | 0.31              | 0.97                  |
| GO:0044451        | <i>nucleoplasm part</i>                         | 0.90%            | -4.9706                         | 0.31              | 0.82                  |
| GO:0070013        | <i>intracellular organelle lumen</i>            | 2.74%            | -2.4559                         | 0.27              | 0.95                  |
| GO:0031981        | <i>nuclear lumen</i>                            | 2.29%            | -2.9547                         | 0.26              | 0.87                  |
| <b>GO:0031974</b> | <b>membrane-enclosed lumen</b>                  | <b>2.74%</b>     | <b>-2.4559</b>                  | <b>0.91</b>       | <b>0</b>              |
| <b>GO:0043226</b> | <b>organelle</b>                                | <b>20.79%</b>    | <b>-4.0615</b>                  | <b>0.92</b>       | <b>0</b>              |
| <b>GO:0044464</b> | <b>cell part</b>                                | <b>52.39%</b>    | <b>-4.4935</b>                  | <b>0.72</b>       | <b>0.12</b>           |
| <b>GO:0005829</b> | <b>cytosol</b>                                  | <b>2.55%</b>     | <b>-3.8268</b>                  | <b>0.67</b>       | <b>0.17</b>           |
| <b>GO:0044424</b> | <b>intracellular part</b>                       | <b>35.65%</b>    | <b>-3.8386</b>                  | <b>0.62</b>       | <b>0.35</b>           |
| <b>GO:0005622</b> | <b>intracellular</b>                            | <b>41.18%</b>    | <b>-3.52</b>                    | <b>0.71</b>       | <b>0.38</b>           |
| <b>GO:0044427</b> | <b>chromosomal part</b>                         | <b>1.12%</b>     | <b>-3.1024</b>                  | <b>0.36</b>       | <b>0.5</b>            |
| GO:0000785        | <i>chromatin</i>                                | 0.47%            | -1.8861                         | 0.4               | 0.84                  |
| <b>GO:0070449</b> | <b>elongin complex</b>                          | <b>0.01%</b>     | <b>-1.719</b>                   | <b>0.48</b>       | <b>0.53</b>           |
| <b>GO:0005694</b> | <b>chromosome</b>                               | <b>1.51%</b>     | <b>-2.1232</b>                  | <b>0.47</b>       | <b>0.54</b>           |
| <b>GO:0044428</b> | <b>nuclear part</b>                             | <b>3.12%</b>     | <b>-1.857</b>                   | <b>0.33</b>       | <b>0.57</b>           |
| <b>GO:0005634</b> | <b>nucleus</b>                                  | <b>8.97%</b>     | <b>-8.9136</b>                  | <b>0.35</b>       | <b>0.58</b>           |
| GO:0043231        | <i>intracellular membrane-bounded organelle</i> | 13.76%           | -3.3686                         | 0.33              | 0.75                  |
| <b>GO:0043229</b> | <b>intracellular organelle</b>                  | <b>19.92%</b>    | <b>-4.091</b>                   | <b>0.35</b>       | <b>0.62</b>           |
| GO:0043227        | <i>membrane-bounded organelle</i>               | 14.45%           | -3.6861                         | 0.44              | 0.7                   |

**Supplemental Table S3. REVIGO Biological Process GO-term Enrichment Analysis**

| <i>mlk1/2/3</i> ZT12 |                                                        |               |                           |             |                |
|----------------------|--------------------------------------------------------|---------------|---------------------------|-------------|----------------|
| GO-term ID           | Description                                            | Frequency     | Log <sub>10</sub> p-value | Uniqueness  | Dispensability |
| GO:0040029           | regulation of gene expression, epigenetic              | 0.13%         | -1.4572                   | 1           | 0              |
| <i>mlk1/3/4</i> ZT12 |                                                        |               |                           |             |                |
| GO-term ID           | Description                                            | Frequency     | Log <sub>10</sub> p-value | Uniqueness  | Dispensability |
| <b>GO:0006325</b>    | <b>chromatin organization</b>                          | <b>0.67%</b>  | <b>-10.4078</b>           | <b>0.88</b> | <b>0</b>       |
| GO:0016043           | <i>cellular component organization</i>                 | 7.24%         | -2.5575                   | 0.86        | 0.75           |
| GO:0007064           | <i>mitotic sister chromatid cohesion</i>               | 0.05%         | -2.1267                   | 0.89        | 0.54           |
| GO:0051276           | <i>chromosome organization</i>                         | 1.48%         | -10.1433                  | 0.87        | 0.53           |
| GO:0016570           | <i>histone modification</i>                            | 0.37%         | -2.0696                   | 0.77        | 0.9            |
| GO:0016569           | <i>covalent chromatin modification</i>                 | 0.42%         | -4.2168                   | 0.8         | 0.7            |
| GO:0006996           | <i>organelle organization</i>                          | 3.60%         | -4.5768                   | 0.86        | 0.65           |
| <b>GO:0007623</b>    | <b>circadian rhythm</b>                                | <b>0.06%</b>  | <b>-1.6968</b>            | <b>0.98</b> | <b>0</b>       |
| <b>GO:0009987</b>    | <b>cellular process</b>                                | <b>63.78%</b> | <b>-1.6536</b>            | <b>0.99</b> | <b>0</b>       |
| <b>GO:0010033</b>    | <b>response to organic substance</b>                   | <b>0.90%</b>  | <b>-4.1475</b>            | <b>0.76</b> | <b>0</b>       |
| GO:0001101           | <i>response to acid chemical</i>                       | 0.12%         | -1.5017                   | 0.79        | 0.59           |
| GO:1901701           | <i>cellular response to oxygen-containing compound</i> | 0.35%         | -2.6778                   | 0.71        | 0.8            |
| GO:1901700           | <i>response to oxygen-containing compound</i>          | 0.50%         | -1.9101                   | 0.77        | 0.68           |
| GO:0097305           | <i>response to alcohol</i>                             | 0.06%         | -3.15                     | 0.76        | 0.55           |
| GO:0009737           | <i>response to abscisic acid</i>                       | 0.03%         | -3.224                    | 0.77        | 0.67           |
| GO:0009725           | <i>response to hormone</i>                             | 0.34%         | -2.3585                   | 0.74        | 0.79           |
| GO:0071359           | <i>cellular response to dsRNA</i>                      | 0.02%         | -1.8794                   | 0.73        | 0.81           |
| GO:0033993           | <i>response to lipid</i>                               | 0.23%         | -2.6289                   | 0.74        | 0.77           |
| GO:0070887           | <i>cellular response to chemical stimulus</i>          | 1.01%         | -2.4437                   | 0.72        | 0.73           |
| GO:0043331           | <i>response to dsRNA</i>                               | 0.03%         | -1.8794                   | 0.76        | 0.83           |
| GO:0071407           | <i>cellular response to organic cyclic compound</i>    | 0.17%         | -2.6615                   | 0.7         | 0.67           |
| GO:0071310           | <i>cellular response to organic substance</i>          | 0.65%         | -1.9393                   | 0.69        | 0.87           |

|                   |                                                                                |              |                |             |          |
|-------------------|--------------------------------------------------------------------------------|--------------|----------------|-------------|----------|
| GO:0014070        | <i>response to organic cyclic compound</i>                                     | 0.23%        | -2.821         | 0.74        | 0.75     |
| <b>GO:0010605</b> | <b>negative regulation of macromolecule metabolic process</b>                  | <b>1.17%</b> | <b>-5.5421</b> | <b>0.51</b> | <b>0</b> |
| GO:0031050        | <i>dsRNA fragmentation</i>                                                     | 0.02%        | -1.9355        | 0.59        | 0.98     |
| GO:0031047        | <i>gene silencing by RNA</i>                                                   | 0.09%        | -4.1379        | 0.56        | 0.75     |
| GO:0048523        | <i>negative regulation of cellular process</i>                                 | 1.83%        | -2.0635        | 0.57        | 0.92     |
| GO:0031324        | <i>negative regulation of cellular metabolic process</i>                       | 1.17%        | -3.3862        | 0.52        | 0.97     |
| GO:0031327        | <i>negative regulation of cellular biosynthetic process</i>                    | 0.77%        | -4.1463        | 0.51        | 0.99     |
| GO:0035194        | <i>posttranscriptional gene silencing by RNA</i>                               | 0.03%        | -3.3893        | 0.59        | 0.84     |
| GO:0035196        | <i>production of miRNAs involved in gene silencing by miRNA</i>                | 0.01%        | -2.5287        | 0.41        | 0.94     |
| GO:0035195        | <i>gene silencing by miRNA</i>                                                 | 0.02%        | -2.8097        | 0.56        | 0.97     |
| GO:0051253        | <i>negative regulation of RNA metabolic process</i>                            | 0.63%        | -1.5129        | 0.47        | 0.96     |
| GO:0070918        | <i>production of small RNA involved in gene silencing by RNA</i>               | 0.02%        | -1.9355        | 0.41        | 0.98     |
| GO:2000113        | <i>negative regulation of cellular macromolecule biosynthetic process</i>      | 0.72%        | -3.4461        | 0.49        | 0.98     |
| GO:0045934        | <i>negative regulation of nucleobase-containing compound metabolic process</i> | 0.70%        | -1.8539        | 0.49        | 0.92     |
| GO:0010629        | <i>negative regulation of gene expression</i>                                  | 0.78%        | -5.1073        | 0.51        | 0.93     |
| GO:0009892        | <i>negative regulation of metabolic process</i>                                | 1.26%        | -4.8962        | 0.57        | 0.87     |
| GO:0009890        | <i>negative regulation of biosynthetic process</i>                             | 0.77%        | -4.0535        | 0.54        | 0.93     |
| GO:0010558        | <i>negative regulation of macromolecule biosynthetic process</i>               | 0.74%        | -4.4935        | 0.5         | 0.92     |
| GO:0016458        | <i>gene silencing</i>                                                          | 0.17%        | -4.8125        | 0.55        | 0.8      |
| GO:0016441        | <i>posttranscriptional gene silencing</i>                                      | 0.03%        | -2.7447        | 0.59        | 0.84     |
| GO:0051172        | <i>negative regulation of nitrogen compound metabolic process</i>              | 0.79%        | -3.8477        | 0.53        | 0.93     |
| <b>GO:0032502</b> | <b>developmental process</b>                                                   | <b>2.81%</b> | <b>-2.6946</b> | <b>0.98</b> | <b>0</b> |



|            |                                                                                             |        |         |      |      |
|------------|---------------------------------------------------------------------------------------------|--------|---------|------|------|
| GO:0048511 | rhythmic process                                                                            | 0.08%  | -1.4271 | 0.98 | 0    |
| GO:0048856 | anatomical structure development                                                            | 2.54%  | -2.4547 | 0.97 | 0    |
| GO:0048731 | <i>system development</i>                                                                   | 1.26%  | -1.342  | 0.95 | 0.86 |
| GO:0050896 | response to stimulus                                                                        | 12.21% | -4.4584 | 0.98 | 0    |
| GO:0065007 | biological regulation                                                                       | 20.50% | -8.3458 | 0.99 | 0    |
| GO:0071840 | cellular component organization or biogenesis                                               | 8.57%  | -1.5986 | 0.98 | 0    |
| GO:0046483 | heterocycle metabolic process                                                               | 29.66% | -5.9066 | 0.85 | 0.05 |
| GO:0006807 | nitrogen compound metabolic process                                                         | 38.74% | -2.7423 | 0.94 | 0.06 |
| GO:1901360 | organic cyclic compound metabolic process                                                   | 30.32% | -4.8928 | 0.89 | 0.08 |
| GO:0006396 | RNA processing                                                                              | 3.21%  | -4.2725 | 0.68 | 0.14 |
| GO:0018193 | peptidyl-amino acid modification                                                            | 1.50%  | -2.2958 | 0.8  | 0.18 |
| GO:0043170 | macromolecule metabolic process                                                             | 39.49% | -2.4622 | 0.88 | 0.21 |
| GO:0010467 | gene expression                                                                             | 19.67% | -5.3325 | 0.81 | 0.22 |
| GO:0006725 | cellular aromatic compound metabolic process                                                | 29.63% | -5.3325 | 0.85 | 0.24 |
| GO:0097298 | regulation of nucleus size                                                                  | 0.00%  | -2.8327 | 0.82 | 0.28 |
| GO:0048519 | negative regulation of biological process                                                   | 1.98%  | -3.7352 | 0.74 | 0.32 |
| GO:0048518 | positive regulation of biological process                                                   | 1.74%  | -2.1864 | 0.74 | 0.33 |
| GO:0040029 | regulation of gene expression, epigenetic                                                   | 0.13%  | -4.4157 | 0.68 | 0.34 |
| GO:0006397 | mRNA processing                                                                             | 0.56%  | -4.266  | 0.7  | 0.36 |
| GO:0008380 | <i>RNA splicing</i>                                                                         | 0.41%  | -2.5214 | 0.71 | 0.62 |
| GO:0000377 | <i>RNA splicing, via transesterification reactions with bulged adenosine as nucleophile</i> | 0.32%  | -1.8729 | 0.71 | 0.99 |
| GO:0000375 | <i>RNA splicing, via transesterification reactions</i>                                      | 0.32%  | -1.7721 | 0.71 | 0.95 |
| GO:0000398 | <i>mRNA splicing, via spliceosome</i>                                                       | 0.32%  | -2.266  | 0.7  | 0.88 |
| GO:0009719 | response to endogenous stimulus                                                             | 0.53%  | -2.1871 | 0.83 | 0.37 |
| GO:0016071 | mRNA metabolic process                                                                      | 0.80%  | -3.0283 | 0.75 | 0.37 |

|                   |                                                                       |               |                |             |             |
|-------------------|-----------------------------------------------------------------------|---------------|----------------|-------------|-------------|
| <b>GO:0090304</b> | <b>nucleic acid metabolic process</b>                                 | <b>21.45%</b> | <b>-5.9706</b> | <b>0.66</b> | <b>0.39</b> |
| GO:0032774        | <i>RNA biosynthetic process</i>                                       | 10.93%        | -3.317         | 0.61        | 0.6         |
| GO:0018130        | <i>heterocycle biosynthetic process</i>                               | 17.39%        | -2.9957        | 0.71        | 0.52        |
| GO:0016070        | <i>RNA metabolic process</i>                                          | 15.95%        | -5.0969        | 0.65        | 0.58        |
| GO:0006351        | <i>transcription, DNA-templated</i>                                   | 10.66%        | -2.7986        | 0.58        | 0.74        |
| GO:0097659        | <i>nucleic acid-templated transcription</i>                           | 10.72%        | -3.0814        | 0.6         | 0.88        |
| GO:0006139        | <i>nucleobase-containing compound metabolic process</i>               | 26.55%        | -5.9747        | 0.7         | 0.6         |
| GO:0019438        | <i>aromatic compound biosynthetic process</i>                         | 16.95%        | -2.7258        | 0.72        | 0.52        |
| GO:1901362        | <i>organic cyclic compound biosynthetic process</i>                   | 17.87%        | -2.5017        | 0.73        | 0.51        |
| GO:0034654        | <i>nucleobase-containing compound biosynthetic process</i>            | 14.53%        | -2.7167        | 0.66        | 0.71        |
| <b>GO:0048583</b> | <b>regulation of response to stimulus</b>                             | <b>1.12%</b>  | <b>-2.6925</b> | <b>0.63</b> | <b>0.4</b>  |
| <b>GO:0044260</b> | <b>cellular macromolecule metabolic process</b>                       | <b>34.28%</b> | <b>-3.4685</b> | <b>0.74</b> | <b>0.43</b> |
| <b>GO:0034641</b> | <b>cellular nitrogen compound metabolic process</b>                   | <b>34.14%</b> | <b>-4.1543</b> | <b>0.77</b> | <b>0.44</b> |
| <b>GO:0050789</b> | <b>regulation of biological process</b>                               | <b>19.37%</b> | <b>-7.8794</b> | <b>0.66</b> | <b>0.45</b> |
| GO:0080090        | <i>regulation of primary metabolic process</i>                        | 11.68%        | -6.5952        | 0.55        | 0.87        |
| GO:0010468        | <i>regulation of gene expression</i>                                  | 10.82%        | -5.2541        | 0.49        | 0.86        |
| GO:0031323        | <i>regulation of cellular metabolic process</i>                       | 11.66%        | -4.2907        | 0.52        | 0.87        |
| GO:0031326        | <i>regulation of cellular biosynthetic process</i>                    | 10.82%        | -4.4377        | 0.49        | 0.89        |
| GO:0051252        | <i>regulation of RNA metabolic process</i>                            | 10.03%        | -3.3936        | 0.42        | 0.86        |
| GO:2001141        | <i>regulation of RNA biosynthetic process</i>                         | 9.97%         | -2.9469        | 0.41        | 0.9         |
| GO:0019219        | <i>regulation of nucleobase-containing compound metabolic process</i> | 10.26%        | -3.7799        | 0.46        | 0.85        |
| GO:2000112        | <i>regulation of cellular macromolecule biosynthetic process</i>      | 10.68%        | -4.1681        | 0.45        | 0.85        |
| GO:0006355        | <i>regulation of transcription, DNA-templated</i>                     | 9.92%         | -2.6576        | 0.41        | 0.9         |
| GO:0060255        | <i>regulation of macromolecule metabolic process</i>                  | 11.72%        | -7.0004        | 0.51        | 0.67        |

|                   |                                                           |               |                |             |             |
|-------------------|-----------------------------------------------------------|---------------|----------------|-------------|-------------|
| GO:0019222        | <i>regulation of metabolic process</i>                    | 11.94%        | -5.8539        | 0.65        | 0.67        |
| GO:0050794        | <i>regulation of cellular process</i>                     | 18.84%        | -5.0937        | 0.6         | 0.76        |
| GO:1903506        | <i>regulation of nucleic acid-templated transcription</i> | 9.97%         | -2.9469        | 0.41        | 0.89        |
| GO:0009889        | <i>regulation of biosynthetic process</i>                 | 10.83%        | -4.3382        | 0.53        | 0.86        |
| GO:0010556        | <i>regulation of macromolecule biosynthetic process</i>   | 10.75%        | -4.4401        | 0.48        | 0.89        |
| GO:0051171        | <i>regulation of nitrogen compound metabolic process</i>  | 10.93%        | -6.4908        | 0.52        | 0.86        |
| <b>GO:0042221</b> | <b>response to chemical</b>                               | <b>3.07%</b>  | <b>-2.6162</b> | <b>0.81</b> | <b>0.46</b> |
| GO:0051716        | <i>cellular response to stimulus</i>                      | 9.56%         | -3.384         | 0.74        | 0.63        |
| GO:0006281        | <i>DNA repair</i>                                         | 2.23%         | -1.4724        | 0.59        | 0.9         |
| GO:0033554        | <i>cellular response to stress</i>                        | 2.97%         | -1.4737        | 0.75        | 0.81        |
| GO:0006974        | <i>cellular response to DNA damage stimulus</i>           | 2.36%         | -1.7122        | 0.75        | 0.51        |
| GO:0080134        | <i>regulation of response to stress</i>                   | 0.34%         | -1.684         | 0.65        | 0.62        |
| <b>GO:0044271</b> | <b>cellular nitrogen compound biosynthetic process</b>    | <b>22.50%</b> | <b>-1.7328</b> | <b>0.71</b> | <b>0.47</b> |
| <b>GO:0018205</b> | <b>peptidyl-lysine modification</b>                       | <b>0.36%</b>  | <b>-1.3134</b> | <b>0.83</b> | <b>0.48</b> |

---

***mlk1/2/3 ZT14***

| <b>GO-term ID</b> | <b>Description</b>                       | <b>Frequency</b> | <b>Log<sub>10</sub> p-value</b> | <b>Uniqueness</b> | <b>Dispensability</b> |
|-------------------|------------------------------------------|------------------|---------------------------------|-------------------|-----------------------|
| <b>GO:0051276</b> | <b>chromosome organization</b>           | <b>1.48%</b>     | <b>-2.7852</b>                  | <b>0</b>          | <b>0</b>              |
| GO:0007064        | <i>mitotic sister chromatid cohesion</i> | 0.05%            | -1.7645                         | 0                 | 0.54                  |
| GO:0006325        | <i>chromatin organization</i>            | 0.67%            | -1.3072                         | 0                 | 0.53                  |

---

***mlk1/3/4 ZT14***

| <b>GO-term ID</b> | <b>Description</b>                            | <b>Frequency</b> | <b>Log<sub>10</sub> p-value</b> | <b>Uniqueness</b> | <b>Dispensability</b> |
|-------------------|-----------------------------------------------|------------------|---------------------------------|-------------------|-----------------------|
| <b>GO:0009628</b> | <b>response to abiotic stimulus</b>           | <b>0.57%</b>     | <b>-1.857</b>                   | <b>0.91</b>       | <b>0</b>              |
| <b>GO:0009987</b> | <b>cellular process</b>                       | <b>63.78%</b>    | <b>-2.1512</b>                  | <b>0.97</b>       | <b>0</b>              |
| <b>GO:0010629</b> | <b>negative regulation of gene expression</b> | <b>0.78%</b>     | <b>-1.644</b>                   | <b>0.62</b>       | <b>0</b>              |
| <b>GO:0050896</b> | <b>response to stimulus</b>                   | <b>12.21%</b>    | <b>-1.8962</b>                  | <b>0.94</b>       | <b>0</b>              |

|                   |                                                          |               |                |             |             |
|-------------------|----------------------------------------------------------|---------------|----------------|-------------|-------------|
| <b>GO:0051276</b> | <b>chromosome organization</b>                           | <b>1.48%</b>  | <b>-2.1175</b> | <b>0.86</b> | <b>0</b>    |
| GO:0006325        | <i>chromatin organization</i>                            | 0.67%         | -1.308         | 0.86        | 0.53        |
| <b>GO:0065007</b> | <b>biological regulation</b>                             | <b>20.50%</b> | <b>-2.4425</b> | <b>0.94</b> | <b>0</b>    |
| <b>GO:0009058</b> | <b>biosynthetic process</b>                              | <b>31.61%</b> | <b>-1.6655</b> | <b>0.88</b> | <b>0.02</b> |
| <b>GO:0044249</b> | <b>cellular biosynthetic process</b>                     | <b>30.05%</b> | <b>-2.762</b>  | <b>0.65</b> | <b>0.06</b> |
| GO:1901576        | <i>organic substance biosynthetic process</i>            | 30.37%        | -2.2013        | 0.68        | 0.66        |
| GO:0018130        | <i>heterocycle biosynthetic process</i>                  | 17.39%        | -1.7144        | 0.68        | 0.53        |
| GO:0019438        | <i>aromatic compound biosynthetic process</i>            | 16.95%        | -1.5114        | 0.68        | 0.53        |
| GO:1901362        | <i>organic cyclic compound biosynthetic process</i>      | 17.87%        | -1.752         | 0.7         | 0.54        |
| <b>GO:1901360</b> | <b>organic cyclic compound metabolic process</b>         | <b>30.32%</b> | <b>-1.301</b>  | <b>0.86</b> | <b>0.07</b> |
| <b>GO:0071704</b> | <b>organic substance metabolic process</b>               | <b>58.36%</b> | <b>-1.5157</b> | <b>0.89</b> | <b>0.08</b> |
| <b>GO:0006807</b> | <b>nitrogen compound metabolic process</b>               | <b>38.74%</b> | <b>-1.4377</b> | <b>0.88</b> | <b>0.09</b> |
| <b>GO:0044237</b> | <b>cellular metabolic process</b>                        | <b>53.06%</b> | <b>-2.2358</b> | <b>0.83</b> | <b>0.18</b> |
| <b>GO:0046483</b> | <b>heterocycle metabolic process</b>                     | <b>29.66%</b> | <b>-1.3439</b> | <b>0.81</b> | <b>0.25</b> |
| <b>GO:0097305</b> | <b>response to alcohol</b>                               | <b>0.06%</b>  | <b>-1.5686</b> | <b>0.91</b> | <b>0.29</b> |
| <b>GO:0019222</b> | <b>regulation of metabolic process</b>                   | <b>11.94%</b> | <b>-3.5229</b> | <b>0.56</b> | <b>0.38</b> |
| GO:0050794        | <i>regulation of cellular process</i>                    | 18.84%        | -1.5935        | 0.52        | 0.76        |
| GO:0050789        | <i>regulation of biological process</i>                  | 19.37%        | -3.0804        | 0.57        | 0.67        |
| GO:0080090        | <i>regulation of primary metabolic process</i>           | 11.68%        | -2.6003        | 0.49        | 0.87        |
| GO:0009889        | <i>regulation of biosynthetic process</i>                | 10.83%        | -1.7986        | 0.4         | 0.86        |
| GO:0031323        | <i>regulation of cellular metabolic process</i>          | 11.66%        | -1.9957        | 0.45        | 0.87        |
| GO:0031326        | <i>regulation of cellular biosynthetic process</i>       | 10.82%        | -1.8665        | 0.38        | 0.86        |
| GO:0060255        | <i>regulation of macromolecule metabolic process</i>     | 11.72%        | -2.8069        | 0.47        | 0.62        |
| GO:0051171        | <i>regulation of nitrogen compound metabolic process</i> | 10.93%        | -2.7959        | 0.49        | 0.86        |
